# Supplementary material for: Effects of solvents and metal ions on the synthesis, structural diversity and magnetic properties of the 5′-nitro-[1,1′:3′,1′′-terphenyl]-3,3′′,5,5′′-tetracarboxylic acid ligand and a highly sensitive sensor for Fe3+
Source: Royal Society of Chemistry journal article supplement (doi:10.1039/d3ce01076g), 2023-11-27
Supplement: d3ce01076g1.pdf [file d3ce01076g1.pdf]

# Effects of solvents and metal ions on the synthesis, structural diversity and magnetic properties of 5'-nitro-[1,1':3',1''-terphenyl]-3,3'',5,5''-tetracarboxylic acid ligand and a highly sensitive sensor for Fe<sup>3+</sup>

Yuan-Yu Yang,<sup>a</sup> Jian-Hua Xue,<sup>a</sup> Dong-Dong Yang,<sup>\*a</sup> Li-Yang Zhang,<sup>a</sup> Qi Ma<sup>\*a</sup> and Xuan Zhao<sup>\*b</sup>

<sup>a</sup> College of Chemistry and Chemical Engineering, Shanxi Datong University, Datong 037009, P. R. China. E-mail: ddyang@sxdtdx.edu.cn; maqihx@163.com.

<sup>b</sup> Department of Chemistry, Key Laboratory of Bioorganic Phosphorus Chemistry & Chemical Biology, Tsinghua University, Beijing 100084, P. R. China. E-mail: zhaox0320@mail.tsinghua.edu.cn

## CONTENTS

**Fig. S1** The IR spectra of H<sub>4</sub>nttba ligand and complexes **1-4**.

**Fig. S2** (a) View of the single 2D framework of complex **1**. (b) The void size of the 2D framework of complex **1**

**Fig. S3** The void size of the 2D framework of complex **2**.

**Fig. S4** The void size of the 2D framework of complex **3**.

**Fig. S5** PXRD patterns of complexes **1-4** at room temperature.

**Fig. S6** The thermal curves of complexes **1-4**.

**Fig. S7** The solid-state emission spectra of complex **4** and H<sub>4</sub>nttba at room temperature.

**Fig.S8** The emission spectra of complex **4** in different solvents.

**Fig. S9** The PXRD patterns of simulated complex **4**, the PXRD patterns of **4** for the recognition of Fe<sup>3+</sup> after five recycling processes.

**Fig. S10** Liquid U - vis spectra of complex **4**, Fe<sup>3+</sup> in the solution.

**Table S1** Selected bond distances (Å) and angles (°) for **1**, **2**, **3** and **4**.

**Table S2**. A comparison of selected MOFs-based luminescent sensors for the detection of Fe<sup>3+</sup> ion.

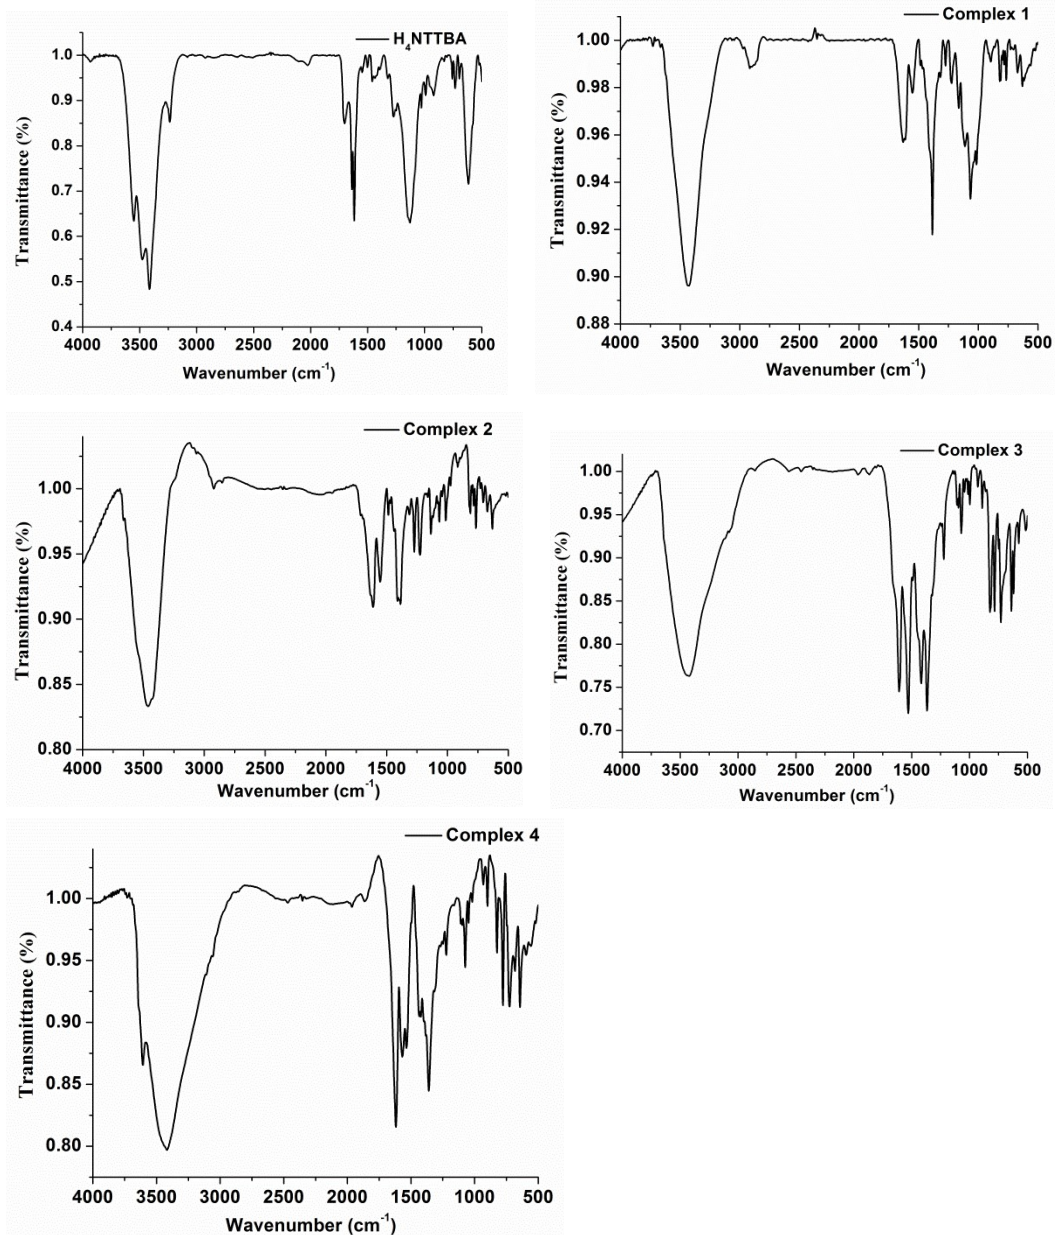

**Fig. S1** The IR spectra of  $H_4nttba$  ligand and complexes 1-4.

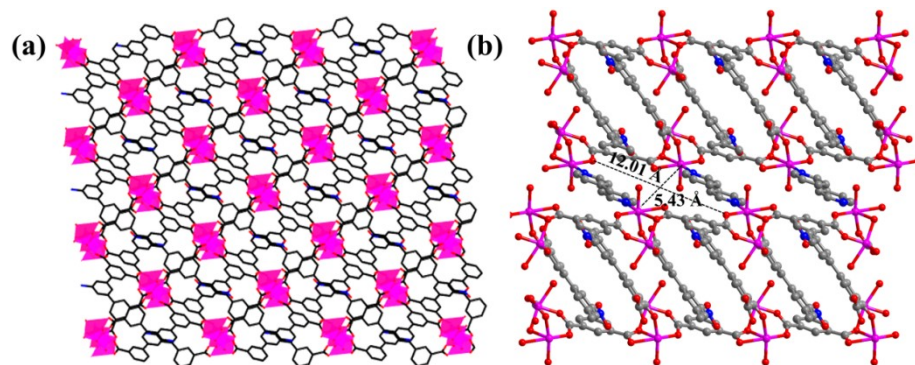

**Fig. S2** (a) View of the single 2D framework of complex 1. (b) The void size of the 2D

framework of complex 1.

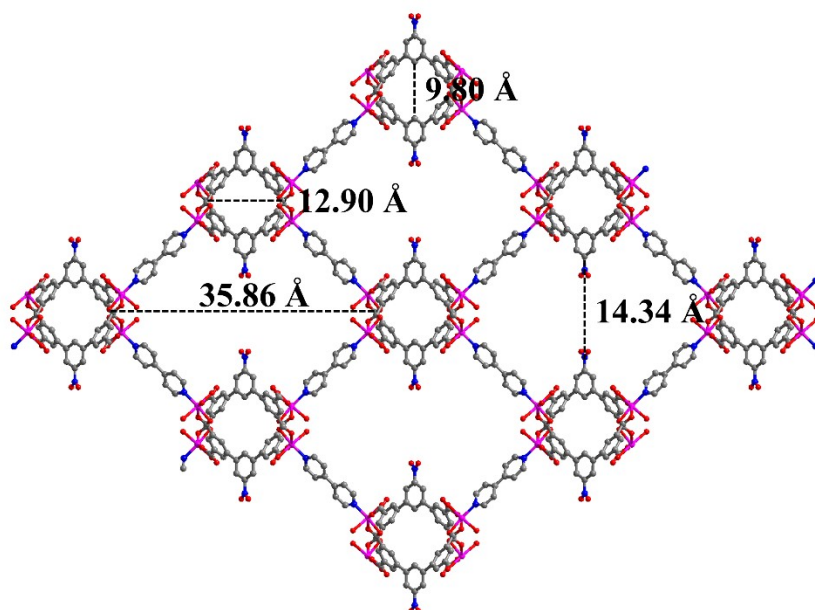

**Fig. S3** The void size of the 2D framework of complex 2.

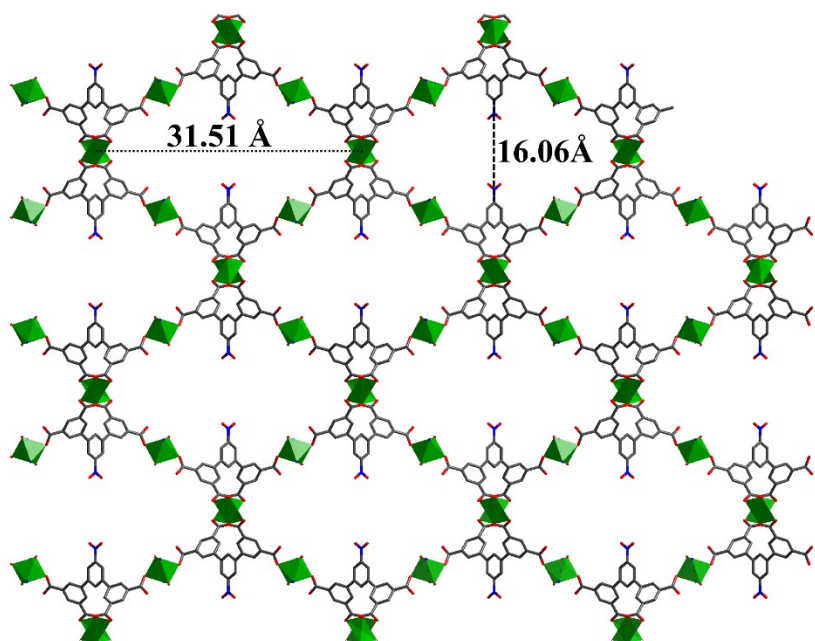

**Fig. S4** The void size of the 2D framework of complex 3.

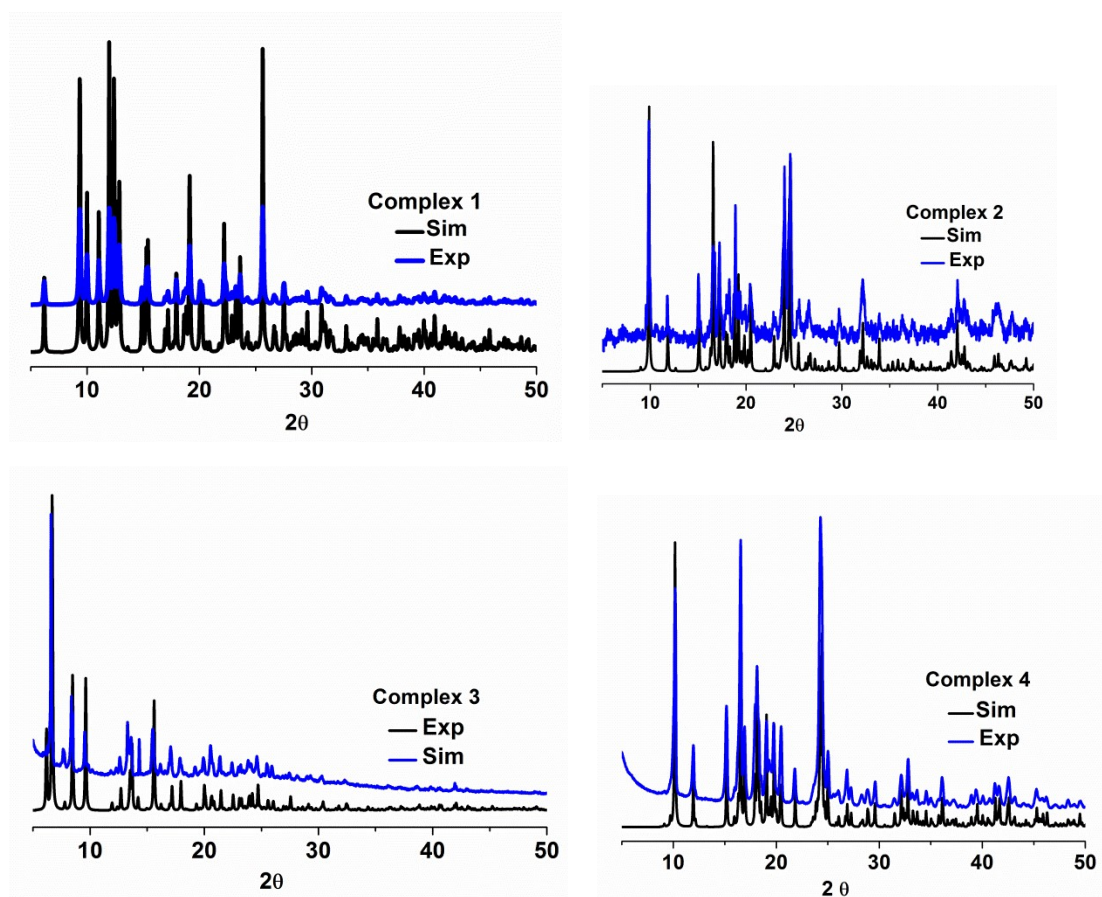

**Fig. S5** PXRD patterns of complexes 1–4 at room temperature. Blue patterns correspond to the experimental data obtained using the as synthesized bulk samples. Black patterns were simulated from the single crystal X-ray data.

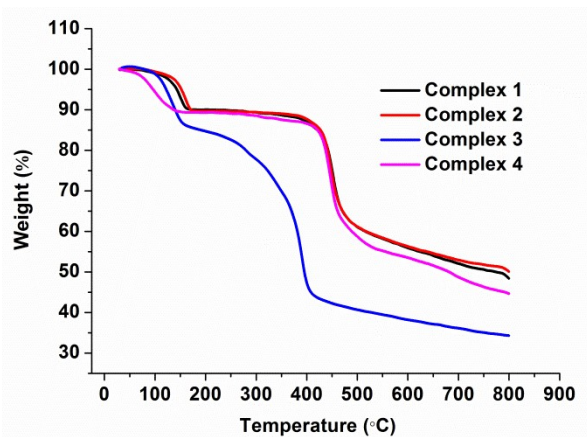

**Fig. S6** The thermal curves of complexes 1-4.

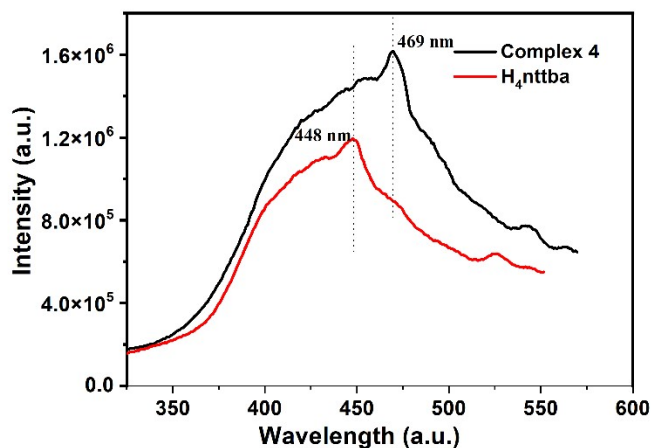

Fig. S7 The solid-state emission spectra of complex 4 and H<sub>4</sub>nttba at room temperature.

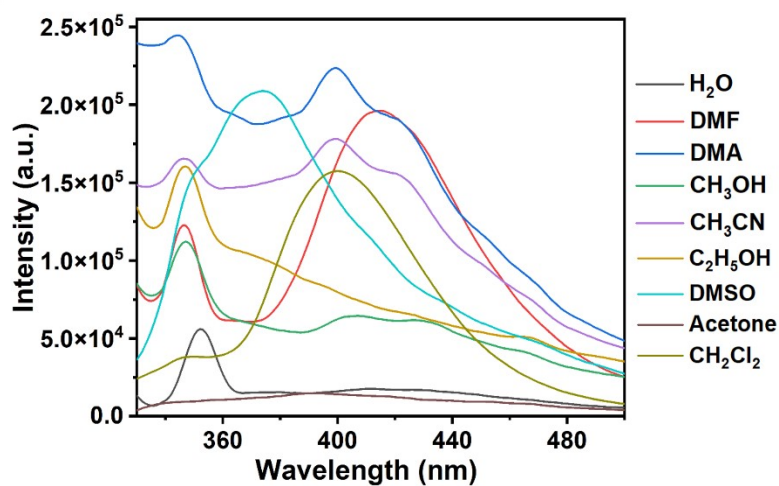

Fig.S8 The emission spectra of complex 4 in different solvents.

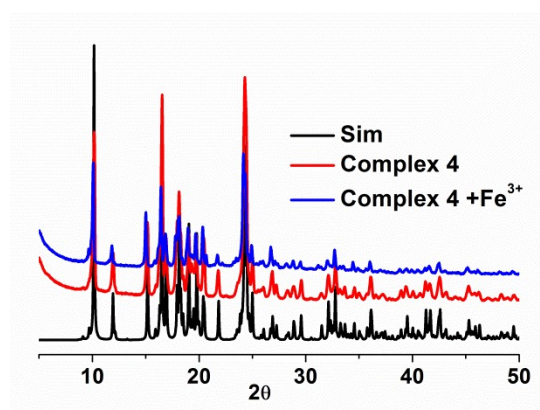

Fig. S9 The PXRD patterns of simulated complex 4, the PXRD patterns of 4 for the recognition of Fe<sup>3+</sup> after five recycling processes.

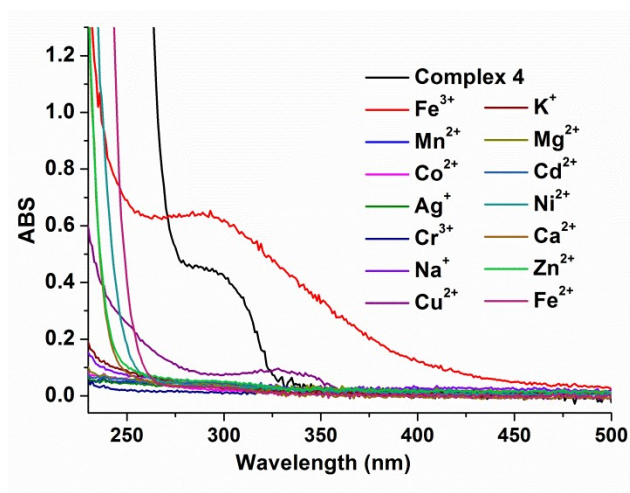

**Fig. S10** Liquid UV - vis spectra of complex **4** ,  $\text{Fe}^{3+}$  in the solution.

**Table S1** Selected bond distances (Å) and angles ( $^\circ$ ) for **1**, **2**, **3** and **4**.

| Complex 1                             |             |                                         |             |
|---------------------------------------|-------------|-----------------------------------------|-------------|
| Co1—O8 <sup>i</sup>                   | 2.050 (3)   | Co2—O7                                  | 1.896 (3)   |
| Co1—N2                                | 2.084 (3)   | Co2—O1 <sup>iii</sup>                   | 1.954 (3)   |
| Co1—O3 <sup>ii</sup>                  | 2.086 (3)   | Co2—O4 <sup>iv</sup>                    | 1.963 (3)   |
| Co1—O11                               | 2.134 (3)   | Co2—O9 <sup>v</sup>                     | 2.124 (3)   |
| Co1—O9                                | 2.165 (3)   | Co2—O12                                 | 2.262 (7)   |
| Co1—O10                               | 2.258 (3)   |                                         |             |
| O8 <sup>i</sup> —Co1—N2               | 95.94 (12)  | O3 <sup>ii</sup> —Co1—O11               | 168.71 (13) |
| O8 <sup>i</sup> —Co1—O3 <sup>ii</sup> | 105.73 (13) | O8 <sup>i</sup> —Co1—O9                 | 100.32 (10) |
| N2—Co1—O3 <sup>ii</sup>               | 88.61 (12)  | N2—Co1—O9                               | 163.65 (11) |
| O8 <sup>i</sup> —Co1—O11              | 85.56 (13)  | O3 <sup>ii</sup> —Co1—O9                | 88.67 (11)  |
| N2—Co1—O11                            | 90.60 (12)  | O11—Co1—O9                              | 88.93 (12)  |
| O8 <sup>i</sup> —Co1—O10              | 157.31 (11) | O7—Co2—O1 <sup>iii</sup>                | 108.91 (15) |
| N2—Co1—O10                            | 104.59 (11) | O7—Co2—O4 <sup>iv</sup>                 | 124.15 (17) |
| O3 <sup>ii</sup> —Co1—O10             | 84.62 (12)  | O1 <sup>iii</sup> —Co2—O4 <sup>iv</sup> | 120.64 (15) |
| O11—Co1—O10                           | 84.69 (12)  | O7—Co2—O9 <sup>v</sup>                  | 92.97 (13)  |
| O9—Co1—O10                            | 59.10 (9)   | O1 <sup>iii</sup> —Co2—O9 <sup>v</sup>  | 111.61 (14) |
| O4 <sup>iv</sup> —Co2—O9 <sup>v</sup> | 91.56 (13)  | O4 <sup>iv</sup> —Co2—O12               | 81.3 (2)    |
| O7—Co2—O12                            | 74.5 (2)    | O9 <sup>v</sup> —Co2—O12                | 158.1 (3)   |
| O1 <sup>iii</sup> —Co2—O12            | 89.7 (3)    |                                         |             |

| Complex 2                               |             |                                         |             |
|-----------------------------------------|-------------|-----------------------------------------|-------------|
| Co1—O1                                  | 2.021 (2)   | Co1—O7                                  | 2.121 (3)   |
| Co1—O4 <sup>i</sup>                     | 2.060 (3)   | Co1—O6                                  | 2.162 (3)   |
| Co1—N2                                  | 2.067 (3)   | Co1—O3 <sup>i</sup>                     | 2.277 (3)   |
| O1—Co1—O4 <sup>i</sup>                  | 95.50 (11)  | O1—Co1—O6                               | 87.16 (12)  |
| O1—Co1—N2                               | 98.42 (12)  | O4 <sup>i</sup> —Co1—O6                 | 91.09 (13)  |
| O4 <sup>i</sup> —Co1—N2                 | 165.92 (12) | N2—Co1—O6                               | 87.50 (13)  |
| O1—Co1—O7                               | 92.83 (11)  | O7—Co1—O6                               | 177.68 (12) |
| O4 <sup>i</sup> —Co1—O7                 | 91.22 (13)  | O1—Co1—O3 <sup>i</sup>                  | 155.38 (11) |
| N2—Co1—O7                               | 90.21 (13)  | O4 <sup>i</sup> —Co1—O3 <sup>i</sup>    | 60.47 (10)  |
| N2—Co1—O3 <sup>i</sup>                  | 105.46 (11) | O6—Co1—O3 <sup>i</sup>                  | 87.97 (12)  |
| O7—Co1—O3 <sup>i</sup>                  | 92.98 (12)  |                                         |             |
| Complex 3                               |             |                                         |             |
| Ni1—O6 <sup>i</sup>                     | 2.0484 (12) | Ni2—N1 <sup>ii</sup>                    | 2.0537 (15) |
| Ni1—O6                                  | 2.0485 (12) | Ni2—N1 <sup>iii</sup>                   | 2.0537 (15) |
| Ni1—O4                                  | 2.0705 (11) | Ni2—O2                                  | 2.0943 (12) |
| Ni1—O4 <sup>i</sup>                     | 2.0705 (11) | Ni2—O2 <sup>iv</sup>                    | 2.0944 (12) |
| Ni1—N2                                  | 2.1219 (14) | Ni2—O1 <sup>iv</sup>                    | 2.1283 (13) |
| Ni1—N2 <sup>i</sup>                     | 2.1220 (14) | Ni2—O1                                  | 2.1284 (13) |
| O6 <sup>i</sup> —Ni1—O6                 | 180.0       | O4—Ni1—O4 <sup>i</sup>                  | 180.00 (6)  |
| O6 <sup>i</sup> —Ni1—O4                 | 87.87 (5)   | O6 <sup>i</sup> —Ni1—N2                 | 90.21 (5)   |
| O6—Ni1—O4                               | 92.13 (5)   | O6—Ni1—N2                               | 89.79 (5)   |
| O6 <sup>i</sup> —Ni1—O4 <sup>i</sup>    | 92.14 (5)   | O4—Ni1—N2                               | 89.33 (5)   |
| O6—Ni1—O4 <sup>i</sup>                  | 87.87 (5)   | O4 <sup>i</sup> —Ni1—N2                 | 90.67 (5)   |
| O6 <sup>i</sup> —Ni1—N2 <sup>i</sup>    | 89.79 (5)   | N1 <sup>ii</sup> —Ni2—O2                | 96.21 (6)   |
| O6—Ni1—N2 <sup>i</sup>                  | 90.21 (5)   | N1 <sup>iii</sup> —Ni2—O2               | 100.67 (5)  |
| O4—Ni1—N2 <sup>i</sup>                  | 90.68 (5)   | N1 <sup>ii</sup> —Ni2—O2 <sup>iv</sup>  | 100.67 (5)  |
| O4 <sup>i</sup> —Ni1—N2 <sup>i</sup>    | 89.32 (5)   | N1 <sup>iii</sup> —Ni2—O2 <sup>iv</sup> | 96.21 (6)   |
| N2—Ni1—N2 <sup>i</sup>                  | 180.0       | O2—Ni2—O2 <sup>iv</sup>                 | 156.16 (7)  |
| N1 <sup>ii</sup> —Ni2—N1 <sup>iii</sup> | 89.51 (9)   | N1 <sup>ii</sup> —Ni2—O1 <sup>iv</sup>  | 162.90 (5)  |
| N1 <sup>iii</sup> —Ni2—O1 <sup>iv</sup> | 92.15 (6)   | N1 <sup>iii</sup> —Ni2—O1               | 162.90 (5)  |

|                                        |             |                          |             |
|----------------------------------------|-------------|--------------------------|-------------|
| O2—Ni2—O1 <sup>iv</sup>                | 100.20 (5)  | O2—Ni2—O1                | 62.23 (5)   |
| O2 <sup>iv</sup> —Ni2—O1 <sup>iv</sup> | 62.23 (5)   | O2 <sup>iv</sup> —Ni2—O1 | 100.20 (5)  |
| N1 <sup>ii</sup> —Ni2—O1               | 92.15 (6)   | O1 <sup>iv</sup> —Ni2—O1 | 91.25 (8)   |
| <b>Complex 4</b>                       |             |                          |             |
| Zn1—O4 <sup>i</sup>                    | 1.948 (3)   | Zn1—O6                   | 2.156 (4)   |
| Zn1—O2                                 | 1.966 (3)   | Zn1—O7                   | 2.248 (4)   |
| Zn1—N2                                 | 2.020 (3)   |                          |             |
| O4 <sup>i</sup> —Zn1—O2                | 104.06 (15) | O4 <sup>i</sup> —Zn1—O7  | 89.34 (16)  |
| O4 <sup>i</sup> —Zn1—N2                | 149.22 (15) | O2—Zn1—O7                | 88.22 (15)  |
| O2—Zn1—N2                              | 106.04 (15) | N2—Zn1—O7                | 85.34 (15)  |
| O4 <sup>i</sup> —Zn1—O6                | 92.81 (17)  | O6—Zn1—O7                | 175.61 (15) |
| O2—Zn1—O6                              | 94.96 (14)  | N2—Zn1—O6                | 90.86 (15)  |

**Table S2.** A comparison of selected MOFs-based luminescent sensors for the detection of Fe<sup>3+</sup> ion.

| MOFs and related materials                                                                                               | Analyte          | K <sub>sv</sub> (M <sup>-1</sup> ) | Detection Limit (mol/L) | Ref       |
|--------------------------------------------------------------------------------------------------------------------------|------------------|------------------------------------|-------------------------|-----------|
| Eu <sup>3+</sup> @MIL-124                                                                                                | Fe <sup>3+</sup> | 3.874×10 <sup>4</sup>              | 2.8×10 <sup>-7</sup>    | S1        |
| NTU-9-NS(Ti)                                                                                                             | Fe <sup>3+</sup> | -                                  | 4.5×10 <sup>-7</sup>    | S2        |
| [Cd <sub>2</sub> (L)(bimid)(DMF) <sub>2</sub> ](DMF)                                                                     | Fe <sup>3+</sup> | 3.75×10 <sup>4</sup>               | 3.70×10 <sup>-7</sup>   | S3        |
| Eu-BPDA                                                                                                                  | Fe <sup>3+</sup> | 1.25×10 <sup>4</sup>               | 9×10 <sup>-7</sup>      | S4        |
| {Cd <sub>3</sub> ·L <sup>6</sup> ·(BTB) <sub>2</sub> ·2DMF} <sub>n</sub>                                                 | Fe <sup>3+</sup> | 1.01 × 10 <sup>4</sup>             | 1.12 × 10 <sup>-6</sup> | S5        |
| Eu <sub>2</sub> (OH-BDC) <sub>3</sub>                                                                                    | Fe <sup>3+</sup> | -                                  | 1.17×10 <sup>-6</sup>   | S6        |
| {[Cd(L) <sub>0.5</sub> ](1,8-NDC) · H <sub>2</sub> O]} <sub>n</sub>                                                      | Fe <sup>3+</sup> | 7.75 × 10 <sup>3</sup>             | 1.40 × 10 <sup>-6</sup> | S7        |
| [Zn(L)(bpe)]·DMF                                                                                                         | Fe <sup>3+</sup> | 2.27×10 <sup>4</sup>               | 1.55×10 <sup>-6</sup>   | S8        |
| BUT-14                                                                                                                   | Fe <sup>3+</sup> | 2.17×10 <sup>3</sup>               | 3.8×10 <sup>-6</sup>    | S9        |
| [Zn <sub>2</sub> (cptpy)(btc)(H <sub>2</sub> O)] <sub>n</sub>                                                            | Fe <sup>3+</sup> | 5.456×10 <sup>3</sup>              | 4.33×10 <sup>-6</sup>   | S10       |
| {[Zn(NTTBA) <sub>0.5</sub> (4,4'-bpy) <sub>0.5</sub> (H <sub>2</sub> O) <sub>2</sub> ].0.5H <sub>2</sub> O} <sub>n</sub> | Fe <sup>3+</sup> | 5.05×10 <sup>3</sup>               | 6.96 × 10 <sup>-6</sup> | This work |
| [Tb(BTB)(DMF)]·1.5DMF·2.5H <sub>2</sub> O                                                                                | Fe <sup>3+</sup> | -                                  | 1×10 <sup>-5</sup>      | S11       |
| {[Zn <sub>2</sub> (BIBP) <sub>2</sub> (HL) <sub>2</sub> ] · 2H <sub>2</sub> O} <sub>n</sub>                              | Fe <sup>3+</sup> | 2.21 × 10 <sup>4</sup>             | 2.29 × 10 <sup>-5</sup> | S12       |
| FJI-C8 (Zn)                                                                                                              | Fe <sup>3+</sup> | 8245                               | 2.33×10 <sup>-5</sup>   | S13       |
| [Cd(Hcbic)] <sub>n</sub>                                                                                                 | Fe <sup>3+</sup> | 1.8×10 <sup>5</sup>                | 3.1×10 <sup>-5</sup>    | S14       |
| [Eu(atpt) <sub>1.5</sub> (phen)(H <sub>2</sub> O)] <sub>n</sub>                                                          | Fe <sup>3+</sup> | 7.60×10 <sup>3</sup>               | 4.5×10 <sup>-5</sup>    | S15       |
| {[Zn(L <sup>1</sup> )(dcdps)]} <sub>n</sub>                                                                              | Fe <sup>3+</sup> | 7.004 × 10 <sup>3</sup>            | 6.21 × 10 <sup>-5</sup> | S16       |
| {Zn(L <sup>1</sup> )(bdc)} <sub>n</sub>                                                                                  | Fe <sup>3+</sup> | 9.066 × 10 <sup>3</sup>            | 4.45 × 10 <sup>-5</sup> | S16       |



|                                                                                             |                  |                       |                         |     |
|---------------------------------------------------------------------------------------------|------------------|-----------------------|-------------------------|-----|
| [Zn <sub>5</sub> (hfipbb) <sub>4</sub> (trz) <sub>2</sub> (H <sub>2</sub> O) <sub>2</sub> ] | Fe <sup>3+</sup> | 4.1×10 <sup>5</sup>   | 1.8×10 <sup>-4</sup>    | S17 |
| [Ln(μ <sub>3</sub> -cpta)(phen)(H <sub>2</sub> O) <sub>2</sub> ]n                           | Fe <sup>3+</sup> | 2138                  | 2.0×10 <sup>-4</sup>    | S18 |
| HPU-1 (Zn)                                                                                  | Fe <sup>3+</sup> | 1.0 × 10 <sup>4</sup> | 1.09 × 10 <sup>-3</sup> | S19 |

- Xu, X.-Y.; Yan, B., Eu(III)-Functionalized MIL-124 as Fluorescent Probe for Highly Selectively Sensing Ions and Organic Small Molecules Especially for Fe(III) and Fe(II). *ACS Appl. Mater. Interface* **2014**, *7* (1), 721-729.
- Zhou, L.; Zhao, K.; Hu, Y.-J.; Feng, X.-C.; Shi, P.-D.; Zheng, H.-G., A bifunctional photoluminescent metal–organic framework for detection of Fe<sup>3+</sup> ion and nitroaromatics. *Inorg Chem Commun* **2018**, *89*, 68-72.
- Xu, H.; Gao, J.; Qian, X.; Wang, J.; He, H.; Cui, Y.; Yang, Y.; Wang, Z.; Qian, G., Metal–organic framework nanosheets for fast-response and highly sensitive luminescent sensing of Fe<sup>3+</sup>. *J. Mater. Chem. A* **2016**, *4* (28), 10900-10905.
- Wang, J.; Wang, J.; Li, Y.; Jiang, M.; Zhang, L.; Wu, P., A europium(iii)-based metal–organic framework as a naked-eye and fast response luminescence sensor for acetone and ferric iron. *New J Chem* **2016**, *40* (10), 8600-8606.
- Fan, M.; Sun, B.; Li, X.; Pan, Q.; Sun, J.; Ma, P.; Su, Z., Highly Fluorescent Cadmium Based Metal–Organic Frameworks for Rapid Detection of Antibiotic Residues, Fe<sup>3+</sup> and Cr<sub>2</sub>O<sub>7</sub><sup>2-</sup> Ions. *Inorg. Chem.*, **2021**, *60* (12), 9148-9156.
- Xu, H.; Dong, Y.; Wu, Y.; Ren, W.; Zhao, T.; Wang, S.; Gao, J., An -OH group functionalized MOF for ratiometric Fe<sup>3+</sup> sensing. *J Solid State Chem* **2018**, *258*, 441-446.
- Shi, Y.-S.; Li, Y.-H.; Cui, G.-H.; Dong, G.-Y., New two-dimensional Cd(ii) coordination networks bearing benzimidazolyl-based linkers as bifunctional chemosensors for the detection of acetylacetone and Fe<sup>3+</sup>. *CrystEngComm* **2020**, *22* (5), 905-914.
- Chen, Z.; Mi, X.; Wang, S.; Lu, J.; Li, Y.; Li, D.; Dou, J., Two novel penetrating coordination polymers based on flexible S-containing dicarboxylate acid with sensing properties towards Fe<sup>3+</sup> and Cr<sub>2</sub>O<sub>7</sub><sup>2-</sup> ions. *J Solid State Chem* **2018**, *261*, 75-85.
- Wang, B.; Yang, Q.; Guo, C.; Sun, Y.; Xie, L.-H.; Li, J.-R., Stable Zr(IV)-Based Metal–Organic Frameworks with Predesigned Functionalized Ligands for Highly Selective Detection of Fe(III) Ions in Water. *ACS Appl. Mater. Interface* **2017**, *9* (11), 10286-10295.
- Chen, H.; Fan, P.; Tu, X.; Min, H.; Yu, X.; Li, X.; Zeng, J. L.; Zhang, S.; Cheng, P., A Bifunctional Luminescent Metal–Organic Framework for the Sensing of Paraquat and Fe<sup>3+</sup> Ions in Water. *Chem. Asian J.*, **2019**, *14* (20), 3611-3619.
- Xu, H.; Hu, H.-C.; Cao, C.-S.; Zhao, B., Lanthanide Organic Framework as a Regenerable Luminescent Probe for Fe<sup>3+</sup>. *Inorg. Chem.*, **2015**, *54* (10), 4585-4587.
- Xue, Y.-S.; Zhang, C.; Lv, J. Q.; Chen, N.-N.; Wang, J.; Chen, X.-R.; Fan, L., Luminescence sensing and photocatalytic activities of four Zn(ii)/Co(ii) coordination polymers based on a pyridinephenyl bifunctional ligand. *CrystEngComm* **2021**, *23* (6), 1497-1506.
- Chen, C.-H.; Wang, X.-S.; Li, L.; Huang, Y.-B.; Cao, R., Highly selective sensing of Fe<sup>3+</sup> by an anionic metal–organic framework containing uncoordinated nitrogen and carboxylate oxygen sites. *Dalton Trans.*, **2018**, *47* (10), 3452-3458.
- Li, F.-F.; Zhu, M.-L.; Lu, L.-P., A luminescent Cd(II)-based metal–organic framework for detection of

Fe(III) ions in aqueous solution. *J Solid State Chem* **2018**, *261*, 31-36.

15. Kang, Y.; Zheng, X.-J.; Jin, L.-P., A microscale multi-functional metal-organic framework as a fluorescence chemosensor for Fe(III), Al(III) and 2-hydroxy-1-naphthaldehyde. *J Colloid Interface Sci* **2016**, *471*, 1-6.

16. Ge, F.-Y.; Sun, G.-H.; Meng, L.; Ren, S.-S.; Zheng, H.-G., Four New Luminescent Metal–Organic Frameworks as Multifunctional Sensors for Detecting Fe<sup>3+</sup>, Cr<sub>2</sub>O<sub>7</sub><sup>2-</sup> and Nitromethane. *Cryst. Grow. Des.*, **2019**, *20* (3), 1898-1904.

17. Gu, J.-Z.; Cai, Y.; Liu, Y.; Liang, X.-X.; Kirillov, A. M., New lanthanide 2D coordination polymers constructed from a flexible ether-bridged tricarboxylate block: Synthesis, structures and luminescence sensing. *Inorg. Chim. Acta* **2018**, *469*, 98-104.

18. Li, H.; He, Y.; Li, Q.; Li, S.; Yi, Z.; Xu, Z.; Wang, Y., Highly sensitive and selective fluorescent probe for Fe<sup>3+</sup> and hazardous phenol compounds based on a water-stable Zn-based metal–organic framework in aqueous media. *RSC Adv.* **2017**, *7* (79), 50035-50039.

19. Zhao, X.-L.; Tian, D.; Gao, Q.; Sun, H.-W.; Xu, J.; Bu, X.-H., A chiral lanthanide metal–organic framework for selective sensing of Fe(III) ions. *Dalton Trans.*, **2016**, *45* (3), 1040-1046.
